# Supplementary material for: Do adults with non-communicable diseases meet the German physical activity recommendations?
Source: Springer Nature journal article supplement (doi:10.1007/s12662-021-00711-z), 2021-02-26
Supplement: MOESM2 [file 18908182]

**Supplementary Table 1**

Number of participants included in the analyses calculating unadjusted and multivariate adjusted<sup>1</sup> prevalence of indicators referring to different elements of PA recommendations (health-enhancing aerobic activity; muscle strengthening) depending on self-reported non-communicable diseases (according to STROBE checklist item no. 14)

|                                 | Health-enhancing aerobic activity<br>(≥ 150 min/week of at least moderate PA) |                                 | Muscle strengthening<br>≥ 2 times/week |                                 | Both recommendations for health-enhancing aerobic activity and muscle strengthening fulfilled |                                 |
|---------------------------------|-------------------------------------------------------------------------------|---------------------------------|----------------------------------------|---------------------------------|-----------------------------------------------------------------------------------------------|---------------------------------|
|                                 | <i>n</i> ,<br>unadjusted analysis                                             | <i>n</i> ,<br>adjusted analysis | <i>n</i> ,<br>unadjusted analysis      | <i>n</i> ,<br>adjusted analysis | <i>n</i> ,<br>unadjusted analysis                                                             | <i>n</i> ,<br>adjusted analysis |
| Non-communicable diseases (NCD) |                                                                               |                                 |                                        |                                 |                                                                                               |                                 |
| Coronary heart disease          | 21.704                                                                        | 21.663                          | 22.305                                 | 22.262                          | 21.583                                                                                        | 21.542                          |
| Stroke                          | 21.673                                                                        | 21.632                          | 22.274                                 | 22.231                          | 21.552                                                                                        | 21.511                          |
| Diabetes mellitus               | 22.336                                                                        | 22.295                          | 22.987                                 | 22.943                          | 22.206                                                                                        | 22.165                          |
| Obesity                         | 22.766                                                                        | 22.727                          | 23.423                                 | 23.381                          | 22.630                                                                                        | 22.591                          |
| COPD                            | 21.748                                                                        | 21.708                          | 22.362                                 | 22.320                          | 21.627                                                                                        | 21.587                          |
| Cancer diseases                 | 22.239                                                                        | 22.198                          | 22.875                                 | 22.831                          | 22.110                                                                                        | 22.069                          |
| Osteoarthritis                  | 21.806                                                                        | 21.765                          | 22.420                                 | 22.376                          | 21.683                                                                                        | 21.642                          |
| Low back pain                   | 22.030                                                                        | 21.989                          | 22.660                                 | 22.616                          | 21.907                                                                                        | 21.866                          |
| Neck pain                       | 21.932                                                                        | 21.891                          | 22.546                                 | 22.502                          | 21.807                                                                                        | 22.766                          |
| Depressive symptoms             | 22.614                                                                        | 22.574                          | 23.529                                 | 23.216                          | 22.488                                                                                        | 22.448                          |

*Note.* <sup>1</sup> Adjustments of prevalence considered sex (female, male), four age groups (18-29y; 30-44y; 45-64y; 65y and older), socioeconomic status (low, medium, high) and education level (low, medium, high)

**Supplementary Table 2**

Unadjusted prevalence of indicators referring to different elements of PA recommendations (health-enhancing aerobic activity; muscle strengthening) depending on self-reported non-communicable diseases (according to STROBE checklist item no. 16)

|                                 | Health-enhancing aerobic activity<br>( $\geq 150$ min/week of at least moderate PA) |             | Muscle strengthening<br>$\geq 2$ times/week |             | Both recommendations for health-enhancing aerobic activity and muscle strengthening fulfilled |             |
|---------------------------------|-------------------------------------------------------------------------------------|-------------|---------------------------------------------|-------------|-----------------------------------------------------------------------------------------------|-------------|
|                                 | %                                                                                   | (95 %-CI)   | %                                           | (95 %-CI)   | %                                                                                             | (95 %-CI)   |
| Non-communicable diseases (NCD) |                                                                                     |             |                                             |             |                                                                                               |             |
| Coronary heart disease          | 36.0                                                                                | (33.3–40.5) | 25.9                                        | (22.3–29.5) | 18.7                                                                                          | (15.2–22.2) |
| Stroke                          | 29.4                                                                                | (23.2–35.5) | 25.4                                        | (19.4–31.5) | 16.2                                                                                          | (10.5–22.0) |
| Diabetes mellitus               | 32.7                                                                                | (29.8–35.6) | 21.0                                        | (18.7–23.3) | 14.0                                                                                          | (12.0–16.1) |
| Obesity                         | 31.7                                                                                | (29.9–33.5) | 19.6                                        | (18.2–21.1) | 13.0                                                                                          | (11.8–14.2) |
| COPD                            | 30.0                                                                                | (26.8–33.2) | 25.4                                        | (22.6–28.3) | 16.6                                                                                          | (14.0–19.1) |
| Cancer diseases                 | 43.0                                                                                | (38.6–47.3) | 28.4                                        | (24.7–32.1) | 21.4                                                                                          | (17.9–24.9) |
| Osteoarthritis                  | 43.6                                                                                | (41.4–45.8) | 31.7                                        | (29.8–33.5) | 22.9                                                                                          | (21.1–24.7) |
| Low back pain                   | 41.4                                                                                | (39.9–42.9) | 29.5                                        | (28.5–30.6) | 21.2                                                                                          | (20.1–22.4) |
| Neck pain                       | 41.9                                                                                | (40.3–43.4) | 29.0                                        | (27.7–30.3) | 20.7                                                                                          | (19.5–21.9) |
| Depressive symptoms             | 30.4                                                                                | (27.9–32.8) | 22.7                                        | (20.6–24.8) | 15.0                                                                                          | (13.0–17.0) |

### Supplementary Table 3

Comparison of adjusted prevalence<sup>1</sup> of different indicators for health-enhancing aerobic activities (excluding and including transport-related walking) depending on self-reported non-communicable diseases (sensitivity analysis)

|                                  | Health-enhancing aerobic activity                          |             |                                                            |             |
|----------------------------------|------------------------------------------------------------|-------------|------------------------------------------------------------|-------------|
|                                  | ≥ 150 min/week of at least moderate PA (excluding walking) |             | ≥ 150 min/week of at least moderate PA (including walking) |             |
|                                  | %                                                          | (95 %-CI)   | %                                                          | (95 %-CI)   |
| Reference population             | 45.3                                                       | (44.2–46.4) | 59.9                                                       | (58.9–61.0) |
| Non-communicable diseases (NCDs) |                                                            |             |                                                            |             |
| Coronary heart disease           | 39.0                                                       | (35.3–42.7) | 51.4                                                       | (47.6–55.3) |
| Stroke                           | 34.0                                                       | (27.8–40.1) | 40.9                                                       | (34.7–47.1) |
| Diabetes mellitus                | 34.6                                                       | (31.6–37.6) | 48.3                                                       | (45.1–51.6) |
| Obesity                          | 33.4                                                       | (31.6–35.3) | 48.2                                                       | (46.1–50.2) |
| Chronic lung diseases            | 33.0                                                       | (29.9–36.1) | 46.5                                                       | (43.1–49.9) |
| Cancer diseases                  | 45.0                                                       | (40.5–49.5) | 56.7                                                       | (52.2–61.2) |
| Osteoarthritis                   | 46.3                                                       | (44.0–48.6) | 59.9                                                       | (57.7–62.2) |
| Low back pain                    | 42.4                                                       | (40.8–44.0) | 56.9                                                       | (55.4–58.4) |
| Neck pain                        | 42.6                                                       | (41.0–44.2) | 57.5                                                       | (56.0–59.1) |
| Depressive symptoms              | 32.7                                                       | (30.2–35.2) | 46.0                                                       | (43.4–48.7) |

Notes. <sup>1</sup> Adjustments of prevalence considered sex (female, male), four age groups (18-29y; 30-44y; 45-64y; 65y and older), socio-economic status (low, medium, high) and education level (low, medium, high); <sup>2</sup> Data of the general adult population refers to the whole representative sample of adults (aged 18 years or older) in Germany including all adults with and without NCDs (Finger et al., 2017).

## Supplementary Figure 1

Forest plot for multivariate adjusted odds ratios (OR; adjusted for sex, age group, educational level and SES) and 95% confidence intervals for the two indicators for the fulfilment of recommendations for at least 150 minutes of aerobic activity per week (upper lines: excluding transport-related walking; lower lines: including transport-related walking) for different NCDs (reference category: specified NCD not reported); Source: GEDA-2014/15-EHIS

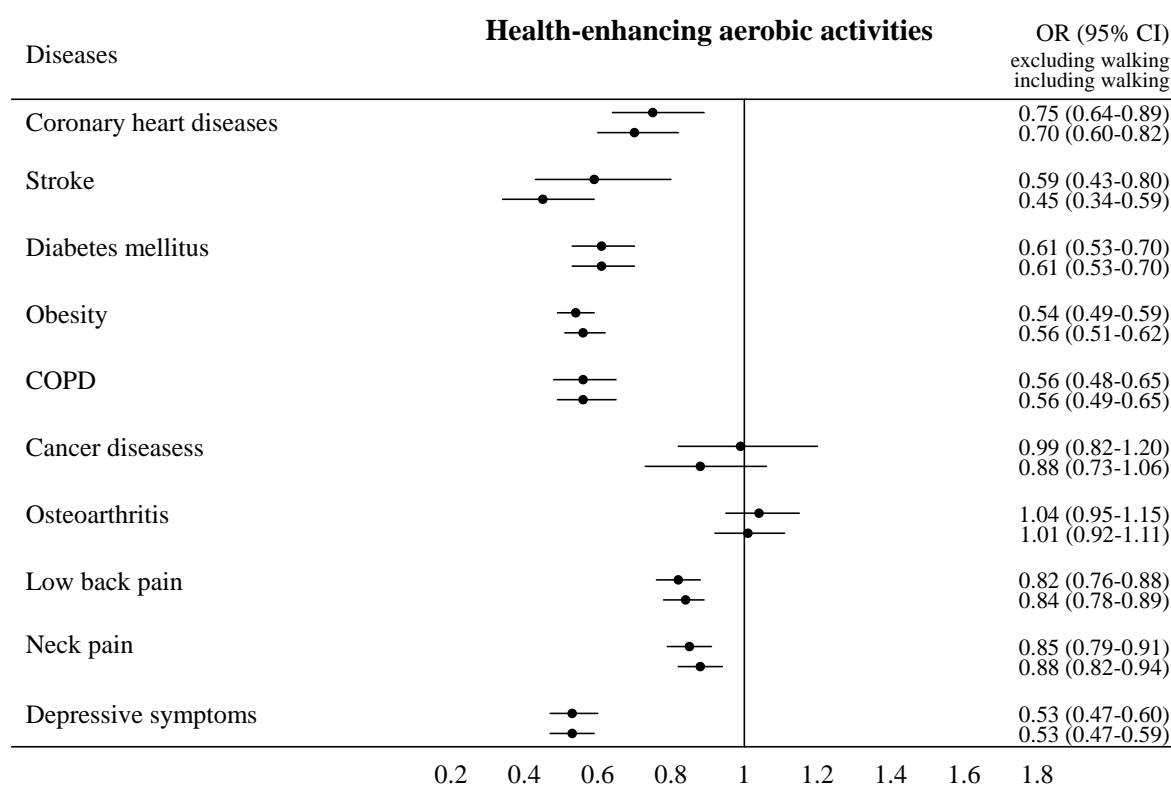

#### Supplementary Table 4

Multivariate adjusted prevalence for different indicators for the fulfillment of PA recommendations depending on the degree of multi-morbidity in terms of the sum of the NCD under study (Source: GEDA-EHIS 2014/2015)

|                              | n          |                 | Health-enhancing<br>aerob activity<br>(≥ 150 min/week of at<br>least moderate PA) |             | Muscle strengthening<br>activities<br>(≥ 2 times/week) |             | Recommendations for<br>health-enhancing aerobic<br>activity and muscle<br>strengthening<br>fulfilled |             |
|------------------------------|------------|-----------------|-----------------------------------------------------------------------------------|-------------|--------------------------------------------------------|-------------|------------------------------------------------------------------------------------------------------|-------------|
|                              |            |                 | n = 22.918                                                                        |             | n = 23.591                                             |             | n = 22.781                                                                                           |             |
|                              | unweighted | %<br>(weighted) | %                                                                                 | (95 %-CI)   | %                                                      | (95 %-CI)   | %                                                                                                    | (95 %-CI)   |
| None of the studied NCD      | 8.441      | 34.4            | 51.4                                                                              | (49.8–53.0) | 31.7                                                   | (30.4–33.1) | 25.8                                                                                                 | (24.4–27.1) |
| 1                            | 8.486      | 34.8            | 44.4                                                                              | (42.8–45.9) | 29.2                                                   | (28.0–30.1) | 22.0                                                                                                 | (20.7–23.2) |
| 2                            | 4.247      | 18.1            | 42.4                                                                              | (40.4–44.4) | 30.3                                                   | (28.3–32.3) | 22.2                                                                                                 | (20.4–24.0) |
| 3                            | 1.808      | 8.1             | 34.4                                                                              | (31.4–37.4) | 25.1                                                   | (22.6–27.6) | 16.8                                                                                                 | (14.6–18.9) |
| 4                            | 682        | 2.9             | 31.9                                                                              | (27.7–36.1) | 27.5                                                   | (23.4–31.7) | 18.8                                                                                                 | (15.3–22.3) |
| 5 or more of the studied NCD | 352        | 1.7             | 26.0                                                                              | (20.2–31.7) | 23.5                                                   | (18.2–28.8) | 14.4                                                                                                 | (9.5–19.2)  |

Note: Low back pain and neck pain were combined for the analyses of multi-morbidities. Adjustments of prevalence considered sex (female, male), four age groups (18-29y; 30-44y; 45-64y; 65y and older), socio-economic status (low, medium, high) and education level (low, medium, high)
